# Supplementary material
Source: PubMed Central journal article supplement (PMC7104693)
Supplement: NIHMS1557134-supplement-Supplementary_References.pdf [file NIHMS1557134-supplement-Supplementary_References.pdf]

## Supplementary References

1. Kline RM, Kline JJ, Di Palma J, et al. Enteric-coated, pH-dependent peppermint oil capsules for the treatment of irritable bowel syndrome in children. *J Pediatr* 2001; 138:125–128.
2. Chumpitazi BP, Hollister EB, Oezguen N, et al. Gut microbiota influences low fermentable substrate diet efficacy in children with irritable bowel syndrome. *Gut Microbes* 2014;5:165–175.
3. Devanarayana NM, Adhikari C, Pannala W, et al. Prevalence of functional gastrointestinal diseases in a cohort of Sri Lankan adolescents: comparison between Rome II and Rome III criteria. *J Trop Pediatr* 2011;57:34–39.
4. Saps M, Sztainberg M, Pusatcioglu C, et al. Accuracy of diagnosis for abdominal migraine in children. *Gastroenterology* 2014;146(Suppl 1):S1099.
5. Rasquin-Weber A, Hyman PE, Cucchiara S, et al. Childhood functional gastrointestinal disorders. *Gut* 1999;45(Suppl 2):II60–II68.
6. Carson L, Lewis D, Tsou M, et al. Abdominal migraine: an under-diagnosed cause of recurrent abdominal pain in children. *Headache* 2011;51:707–712.
7. Symon DN, Russell G. Abdominal migraine: a childhood syndrome defined. *Cephalalgia* 1986;6:223–228.
8. Abu-Arafeh I, Russell G. Prevalence and clinical features of abdominal migraine compared with those of migraine headache. *Arch Dis Child* 1995;72:413–417.
9. Tan V, Sahami AR, Peebles R, et al. Abdominal migraine and treatment with intravenous valproic acid. *Psychosomatics* 2006;47:353–355.
10. Symon DN, Russell G. Double blind placebo controlled trial of pizotifen syrup in the treatment of abdominal migraine. *Arch Dis Child* 1995;72:48–50.
11. Catto-Smith AG, Ranuh R. Abdominal migraine and cyclical vomiting. *Semin Pediatr Surg* 2003;12:254–258.
12. Worawattanakul M, Rhoads JM, Lichtman SN, et al. Abdominal migraine: prophylactic treatment and follow-up. *J Pediatr Gastroenterol Nutr* 1999;28:37–40.
13. Van Tilburg MAL, Walker L, Palsson O, et al. Prevalence of child/adolescent functional gastrointestinal disorders in a national U.S. community sample. *Gastroenterology* 2014;146(Suppl 1):S142–S144.
14. Devanarayana NM, Rajindrajith S, Rathnamalala N, et al. Delayed gastric emptying rates and impaired antral motility in children fulfilling Rome III criteria for functional abdominal pain. *Neurogastroenterol Motil* 2012; 24:420–425; e207.
15. Zernikow B, Wager J, Hechler T, et al. Characteristics of highly impaired children with severe chronic pain: a 5-year retrospective study on 2249 pediatric pain patients. *BMC Pediatr* 2012;12:54.
16. Yacob D, Di Lorenzo C, Bridge JA, et al. Prevalence of pain-predominant functional gastrointestinal disorders and somatic symptoms in patients with anxiety or depressive disorders. *J Pediatr* 2013;163:767–770.
17. Boey CCM, Goh KL. The significance of life-events as contributing factors in childhood recurrent abdominal pain in an urban community in Malaysia. *J Psychosom Res* 2001;51:559–562.
18. van Tilburg MA, Runyan DK, Zolotor AJ, et al. Unexplained gastrointestinal symptoms after abuse in a prospective study of children at risk for abuse and neglect. *Ann Fam Med* 2010;8:134–140.
19. Pourmoghaddas Z, Saneian H, Roohafza H, et al. Mebeverine for pediatric functional abdominal pain: a randomized, placebo-controlled trial. *Biomed Res Int* 2014;2014:191026.
20. Saps M, Youssef N, Miranda A, et al. Multicenter, randomized, placebo-controlled trial of amitriptyline in children with functional gastrointestinal disorders. *Gastroenterology* 2009;137:1261–1269.
21. Bahar RJ, Collins BS, Steinmetz B, et al. Double-blind placebo-controlled trial of amitriptyline for the treatment of irritable bowel syndrome in adolescents. *J Pediatr* 2008;152:685–689.
22. Roohafza H, Pourmoghaddas Z, Saneian H, et al. Citalopram for pediatric functional abdominal pain: a randomized, placebo-controlled trial. *Neurogastroenterol Motil* 2014;26:1642–1650.
23. Vlioger AM, Rutten JM, Govers AM, et al. Long-term follow-up of gut-directed hypnotherapy vs. standard care in children with functional abdominal pain or irritable bowel syndrome. *Am J Gastroenterol* 2012; 107:627–631.
24. Levy RL, Langer SL, Walker LS, et al. Cognitive-behavioral therapy for children with functional abdominal pain and their parents decreases pain and other symptoms. *Am J Gastroenterol* 2010;105:946–956.
25. Mugie SM, Benninga MA, Di Lorenzo C. Epidemiology of constipation in children and adults: a systematic review. *Best Pract Res Clin Gastroenterol* 2011;25:3–18.
26. van den Berg MM, Benninga MA, Di Lorenzo C. Epidemiology of childhood constipation: a systematic review. *Am J Gastroenterol* 2006;101:2401–2409.
27. Tabbers MM, Benninga MA, Di Lorenzo C, et al. Evaluation and treatment of functional constipation in infants and children: evidence-based recommendations from ESPGHAN and NASPGHAN. *J Pediatr Gastroenterol Nutr* 2014;58:258–274.
28. Pijpers MA, Bongers ME, Benninga MA, et al. Functional constipation in children: a systematic review on prognosis and predictive factors. *J Pediatr Gastroenterol Nutr* 2010;50:256–268.
29. Tabbers MM, Boluyt N, Berger MY, et al. Constipation in children. *Clin Evid (Online)* 2010;2010.
30. Nurko S, Zimmerman LA. Evaluation and treatment of constipation in children and adolescents. *Am Fam Physician* 2014;90:82–90.
31. Borowitz SM, Cox DJ, Kovatchev B, et al. Treatment of childhood constipation by primary care physicians: efficacy and predictors of outcome. *Pediatrics* 2005; 115:873–877.
32. Lee-Robichaud H, Thomas K, Morgan J, et al. Lactulose versus polyethylene glycol for chronic constipation. *Cochrane Database Syst Rev* 2010:CD007570.
33. Gordon M, Naidoo K, Akobeng AK, et al. Osmotic and stimulant laxatives for the management of childhood constipation. *Cochrane Database Syst Rev* 2012; 7:CD009118.

34. Gordon M, Naidoo K, Akobeng AK, et al. Cochrane Review: Osmotic and stimulant laxatives for the management of childhood constipation (review). *Evid Based Child Health* 2013;8:57–109.
35. Benninga MA, Buller HA, Staalman CR, et al. Defaecation disorders in children, colonic transit time versus the Barr-score. *Eur J Pediatr* 1995;154:277–284.
36. Bongers ME, Voskuil WP, van Rijn RR, et al. The value of the abdominal radiograph in children with functional gastrointestinal disorders. *Eur J Radiol* 2006;59:8–13.
37. Mellon MW, Whiteside SP, Friedrich WN. The relevance of fecal soiling as an indicator of child sexual abuse: a preliminary analysis. *J Dev Behav Pediatr* 2006;27:25–32.
38. van der Plas RN, Benninga MA, Buller HA, et al. Biofeedback training in treatment of childhood constipation: a randomised controlled study. *Lancet* 1996;348:776–780.
39. Voskuil WP, Reitsma JB, van Ginkel R, et al. Longitudinal follow-up of children with functional nonretentive fecal incontinence. *Clin Gastroenterol Hepatol* 2006;4:67–72.
40. Walker LS, Smith CA, Garber J, et al. Testing a model of pain appraisal and coping in children with chronic abdominal pain. *Health Psychol* 2005;24:364–374.
